# Supplementary material
Source: ML conference proceedings conference paper supplement (https://proceedings.mlr.press/v115/lee20b.html)
Supplement: Supplementary file 1 [file lee20b-supp.pdf]

## A A SUPPLEMENTARY MATERIAL TO GENERAL IDENTIFIABILITY WITH ARBITRARY SURROGATE EXPERIMENTS

### A.1 DERIVATION

We derive an expression for Fig. 1a as follows

$$\begin{aligned}
P_{x_1, x_2}(y) &= \sum_w P_{x_1, x_2}(y, w) \\
&= \sum_w P_{w, x_1, x_2}(y) P_{y, x_1, x_2}(w) \\
&= \sum_w P_{x_2, w, x_1}(y) P_{x_1}(w) \\
&= \sum_w P_{x_2, w}(y) P_{x_1}(w) \\
&= \sum_w P_{x_2}(y|w) P_{x_1}(w)
\end{aligned}$$

The query  $P_{x_1, x_2}(y)$  is rewritten as  $\sum_w P_{x_1, x_2}(w, y)$  and factorized  $\sum_w P_{w, x_1, x_2}(y) P_{y, x_1, x_2}(w)$  based on c-component form. For the first term, by Rule 3 and 2 of do-calculus,  $P_{x_2, w, x_1}(y) = P_{x_2, w}(y) = P_{x_2}(y|w)$ . For the second term,  $P_{y, x_1, x_2}(w) = P_{x_1}(w)$  by Rule 3 of do-calculus. Hence,  $P_{x_1, x_2}(y) = \sum_w P_{x_2}(y|w) P_{x_1}(w)$ .

For Fig. 2a, it only requires a single application of Rule 3 of do-calculus. Simply put, intervened variables outside the ancestors of an outcome variable have no effect on the outcome variable. Hence,  $P_{x_1, x_2}(y_1) = P_{x_1}(y_1)$  and  $P_{x_1, x_2}(y_2) = P_{x_2}(y_2)$ .

### A.2 NON-IDENTIFIABILITY MAPPING

**Lemma 9.** *Let  $\mathbf{X}, \mathbf{Y}$  be disjoint sets of variables in  $\mathcal{G}$ . Let  $\mathcal{J}$  be a nonempty subgraph of  $\mathcal{G}$  with root set  $\mathbf{R}$ , where  $\mathbf{R} \subseteq \text{An}(\mathbf{Y})_{\mathcal{G}_{\mathbf{X}}}$ . Let  $\mathcal{M}_1$  and  $\mathcal{M}_2$ , which are compatible with  $\mathcal{J}$ , satisfy*

$$\sum_{\mathbf{r} | \bigoplus \mathbf{r} = 1} P_{\mathbf{x} \cap \mathcal{J}}^1(\mathbf{r}) \neq \sum_{\mathbf{r} | \bigoplus \mathbf{r} = 1} P_{\mathbf{x} \cap \mathcal{J}}^2(\mathbf{r})$$

for some  $\mathbf{x}$  where all variables in  $\mathbf{R}$  are binary. Then, there are two models  $\mathcal{M}'_1$  and  $\mathcal{M}'_2$  compatible with  $\mathcal{G}$  such that  $P_{\mathbf{x}}^{\prime 1}(y) \neq P_{\mathbf{x}}^{\prime 2}(y)$  for some  $y$ .

*Proof.* Similar results appear in identifiability literature, e.g., [Shpitser and Pearl, 2006, Thm. 4]. We first employ their strategies in the proof, and discuss about some theoretical oversight. By the condition  $\text{An}(\mathbf{Y})_{\mathcal{G}_{\mathbf{X}}}$ , there exist directed downward paths from  $\mathbf{R}$  to  $\mathbf{Y}$  where no  $\mathbf{X}$  appear in-between and each node has at most one child. That is, one can parametrize each node (which is binary) in the

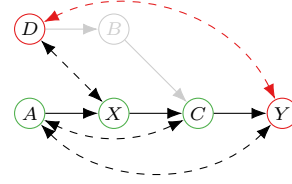

Figure 6: A causal graph  $\mathcal{G}$  with a hedge  $\langle \mathcal{F}, \mathcal{F}' \rangle$  for  $P_x(y)$  where  $\mathcal{F} = \mathcal{G} \setminus \{B\}$  with  $\mathcal{F}'$  shown in red and variables in  $\mathcal{F}''$  shown in green. Bit-parity of  $D$  and  $Y$  should be mapped to  $Y$  through  $B$  and  $C$  where  $C$  is in the top of the hedge.

paths as an exclusive-or of its observable parents. Then, the discrepancy in bit-parity for  $\mathbf{R}$  in  $\mathcal{M}_1$  and  $\mathcal{M}_2$  will also be happened at  $\mathbf{Y}$  in  $\mathcal{M}'_1$  and  $\mathcal{M}'_2$  under  $do(\mathbf{x})$  (n.b. values of  $\mathbf{x}$  outside  $\mathcal{J}$  are irrelevant to  $\mathbf{Y}$ ).

A possible oversight is that the downward paths might cross  $\mathcal{J}$  without passing  $\mathbf{X}$  (see Fig. 6 for an example). The remedy is simple. For nodes appearing in the directed downward paths from  $\mathbf{R}$  to  $\mathbf{Y}$ , we can assign an additional bit to pass bit parity information from  $\mathbf{R}$  to  $\mathbf{Y}$ . Further, given a probability distribution  $P_w(\mathbf{z})$  on which  $\mathcal{M}_1$  and  $\mathcal{M}_2$  agree ( $\mathbf{W}, \mathbf{Z} \subseteq \mathbf{V}(\mathcal{J})$ ),  $\mathcal{M}'_1$  and  $\mathcal{M}'_2$  will also agree on  $P_{\mathbf{w} \cup \mathbf{b}}(\mathbf{z})$  for any  $\mathbf{b} \in \mathfrak{X}_{\mathbf{B}}$  where  $\mathbf{B} \subseteq \mathbf{V}(\mathcal{G}) \setminus \mathbf{V}(\mathcal{J})$  for two reasons: Variables outside the paths from  $\mathbf{R}$  to  $\mathbf{Y}$  and  $\mathcal{J}$  are ignored. Both models  $\mathcal{M}'_1$  and  $\mathcal{M}'_2$  behave exactly the same for nodes between  $\mathbf{R}$  to  $\mathbf{Y}$ .  $\square$
